# Supplementary material
Source: publisher figshare collection journal article supplement (https://wiley.figshare.com/articles/dataset/_/3557958)
Supplement: Supplementary file 1 [file 1]

Appendix E. Posterior means and standard errors for estimated 2008 Bering sea seal survey classification rates.

TABLE E1. Posterior mean (SD) for classification probabilities ( $\pi^{\tilde{S}|S}$ ) associated with model  $\lambda(cov, j)$ . Rows give true species identity, while columns give classified species.

|         | Bearded    | Ribbon     | Ringed     | Spotted    | Unknown    |
|---------|------------|------------|------------|------------|------------|
| Bearded | 0.56(0.06) | 0.01(0.01) | 0.05(0.03) | 0.02(0.01) | 0.37(0.06) |
| Ribbon  | 0.01(0.01) | 0.47(0.05) | 0.02(0.01) | 0.09(0.03) | 0.41(0.05) |
| Ringed  | 0.05(0.03) | 0.02(0.01) | 0.81(0.10) | 0.01(0.01) | 0.11(0.10) |
| Spotted | 0.02(0.01) | 0.09(0.03) | 0.01(0.01) | 0.65(0.10) | 0.24(0.09) |

TABLE E2. Posterior mean (SD) for classification probabilities ( $\pi^{\tilde{S}|S}$ ) associated with model  $\lambda(j)$ . Rows give true species identity, while columns give classified species.

|         | Bearded    | Ribbon     | Ringed     | Spotted    | Unknown    |
|---------|------------|------------|------------|------------|------------|
| Bearded | 0.48(0.05) | 0.01(0.01) | 0.14(0.05) | 0.02(0.01) | 0.35(0.05) |
| Ribbon  | 0.01(0.01) | 0.46(0.03) | 0.02(0.01) | 0.09(0.03) | 0.42(0.03) |
| Ringed  | 0.14(0.05) | 0.02(0.01) | 0.70(0.12) | 0.01(0.01) | 0.13(0.12) |
| Spotted | 0.02(0.01) | 0.09(0.03) | 0.01(0.01) | 0.67(0.08) | 0.21(0.08) |

TABLE E3. Posterior mean (SD) for classification probabilities ( $\pi^{\tilde{S}|S}$ ) associated with model  $\lambda(\textit{pooled})$ . Rows give true species identity, while columns give classified species.

|         | Bearded    | Ribbon     | Ringed     | Spotted    | Unknown    |
|---------|------------|------------|------------|------------|------------|
| Bearded | 0.53(0.11) | 0.03(0.03) | 0.10(0.06) | 0.04(0.03) | 0.31(0.10) |
| Ribbon  | 0.03(0.03) | 0.51(0.09) | 0.06(0.05) | 0.07(0.04) | 0.32(0.09) |
| Ringed  | 0.10(0.06) | 0.06(0.05) | 0.68(0.12) | 0.02(0.02) | 0.14(0.11) |
| Spotted | 0.04(0.03) | 0.07(0.04) | 0.02(0.02) | 0.48(0.05) | 0.39(0.05) |
